# Supplementary material for: Protease-Independent Production of Poliovirus Virus-like Particles in Pichia pastoris: Implications for Efficient Vaccine Development and Insights into Capsid Assembly
Source: PubMed Central journal article supplement (PMC9927490; doi:10.1128/spectrum.04300-22), 2022-12-12
Supplement: spectrum.04300-22-s0001.pdf [file spectrum.04300-22-s0001.pdf]

## Supplementary Materials

### PV1 SC6b P1 Sequence

ATGGGAGCTCAGGTTTCATCACAGAAAGTGGGCGCACATGAAAAC TCAAATGGAGCGTATGGTGGTTC  
TACCATTAATTACACCACCATTAATTATTATAGAGATTGAGCTAGTAACGCGGCTTCGAAACAGGACT  
TCTCTCAAGACCC TTCCAAGTTCACCGAGCCCATCAAGGATGTCCTGATAAAAACAGCCCCAATGCTA  
AACTCGCCAAACATAGAGGCTTGCGGGTATAGCGATAGAGTACTGCAATTAACACTGGGAAACTCCAC  
TATAACCGCACAGGAGGCGGCTAATTCAGTAGTCGCTTATGGGCGTTGGCCTGAATATCTGAGGGACA  
GCGAAGCCAATCCAGTGGACCAGCCGACAGAACCAGAAGTTCGCTGCATGCAGTTTTTATACGCTAGAC  
ACCGTGTCTTGACGAAAGAGTTCGCGAGGGTGGTGGTGGAAAGTTGCCTGATGC ACTGAGGGACATGGG  
ACTCTTTGGGCAAAAATATGTACTACCACTACCTAGGTAGGTCCGGGTACACCGTGCATGTACAGTGTA  
ACGCCTCCAAATTCACCAGGGGGGCACTAGGGGTATTTCGCCGTACCAGAGATGTGTCTGGCCGGGGAT  
AGCAACACCACTACCATGCACACCAGCTATCAAATGCCAATCCTGGCGAGAAAGGAGGCAC TTTTAC  
GGGTACGTTCACTCCTGACAACAACCAGACATCACCTGCCCGCAGGTTCTGCCCGGTGGATTACCTCC  
TTGGAAATGGCACGTTGTTGGGGAATGCCTTTGTGTTCCCGCACCAGATAATAAACCTACGGACCAAC  
AACTGTGCTACACTGGTACTCCCTTACGTGAATCCCTCTCGATAGATAGTATGGTAAAGCACAATAA  
TTGGGGAATTGCAATATTACCATTTGGCCCCATTAATTTTGTCTAGTGAGTCCCTCCCCAGAGATTCCAA  
TCACCTTGACCATAGCCCCTATGTGCTGTGAGTTCAATGGATTAAGAAAACATCACCTGCCACGCTTA  
CAGGGCCTGCCGGTCATGAACACCCCTGGTAGCAATCAATATCTTACTGCAGACA ACTTCCAGTCACC  
GTGTGCGCTGCCTGAATTTGATGTGACCCACCTATTGACATACCCGGTGAAGTAAAGAACATGATGG  
AATTGGCAGAAATCGACACCATGATTCCCTTTGACTTAAGTGCCACAAAAAAGAACACCATGGAAATG  
TATAGGGTTTCGGTTAAGTGACAAAACCACATACAGACGATCCCATACTCTGCCTGTC ACTCTCTCCAGC  
TTCAGATCCTAGTGTGTACATACTATGCTTGGAGAAATCCTAAATTACTACACACACTGGGCAGGAT  
CCCTGAAGTTCACGTTTATGTTCTGTGGATCCATGATGGCAACTGGCAAAC TGTGGTGTGCATACGCG  
CCTCCTGGAGCCGACCCACCAAAGAAGCGTAAGGAGGCGATGTTGGGAACACATGTGATCTGGGACAT  
AGGACTGCAGTCCCTCATGTACTATGGTAGTGCCATGGATTAGCAACACCACGTATCGGCTAACCATAG  
ATGATAGTTTTACCGAAGGCGGATACATCAGCGTCTTCTACCAAAC TAGAATAGTCGTCCCTCTTTTCG  
ACACCCAGAGAGATGGACATCCTTGGTTTTGTGTGTCAGCGTGAATGACTTCAGCGTGCCTTGTGCG  
AGATACCACACATATAGAGCAAAAAGCGCTAGCACAGGGGTTAGGTCAGATGCTTGAAAGCATGATTG  
ACAACACAGTCCGTGAAACGGTGGGGGCGGCAACATCTAGAGACGCTCTCCCAAACACTGAAGCCAGT  
GGACCAACACACTCCAAGGAAAATCCGGCACTCACCGCAGTGGAAACTGGGGCCACAAA TCCACTAGT  
CCCTTCTGATACAGTGCAAACCAGACATGTTGTACAACATAGGTCAAGGTCAGAGTCTAGCATAGAGT  
CTTTCTTCGCGCGGGGTGCATGCGTGACCATTATGACCGTGGATAACCCAGCTTCCACCACGAATAAG  
GATAAGCTATTTGCAGTGTGGAAGATCACTTATAAAGATACTGTCCAGTTACGGAGGAAAATTGGAGTT  
CTTCACCTATTCTAGATTTGATATGGAACCTTACCTTTGTGGTTACTGCAAAATTTCACTGAGACTAACA  
ATGGGCATGCCTTAAATCAAGTGTACCAAATTTATGTACGTACCACCAGGCGCTCCAGTGC CCGAGAAA  
TGGGACGACTACACATGGCAAACCTCATCAAATCCATCAATCTTTTACACCTACGGAACAGCTCCAGC  
CCGATCTCGGTACCGTATGTTGGTATTTTGAACGCCTATTCACACTTTTACGACGGTTTTTTCCAAAG  
TACCACTGAAGGACCAGTCGGCAGCACTAGGTGACTCCCTTTATGGTGCAGCATCTCTAAATGACTTC  
GGTATTTTGGCTGTTAGAGTAGTCAATGATCCCAACCCGACCAAGGTCACCTCCAAAATCAGAGTGTA  
TCTAAAACCCAAACACATCAGAGTCTGGTGGCCGCTCCACCGAGGGCAGTGGCGTACTACGGCCCTG  
GAGTGGATTACAAGGATGGTACGTTACACCCCTCTCCACCAAGGATCTGACCACATATTAG

## PV1 SC6b 6xHIS P1 Sequence

ATGGGAGCTCAGGTTTCATCACAGAAAGTGGGCGCACATGAAAACCTCAAATGGAGCGTATGGTGGTTC  
TACCATTAATTACACCACCATTAATTATTATAGAGATTAGCTAGTAACGCGGCTTCGAAACAGGACT  
TCTCTCAAGACCCCTCCAAGTTCACCGAGCCCATCAAGGATGTCCTGATAAAAACAGCCCCAATGCTA  
AACTCGCCAAACATAGAGGCTTGCGGGTATAGCGATAGAGTACTGCAATTAACACTGGGAAACTCCAC  
TATAACCGCACAGGAGGCGGCTAATTCAGTAGTCGCTTATGGGCGTTGGCCTGAATATCTGAGGGACA  
GCGAAGCCAATCCAGTGGACCAGCCGACAGAACCAGAAGTCGCTGCATGCAGGTTTTATACGCTAGAC  
ACCGTGTCTTGGACGAAAGAGTCGCGAGGGTGGTGGTGGAAAGTTGCCTGATGCACTGAGGGACATGGG  
ACTCTTTGGGCAAAAATATGTACTACCACTACCTAGGTAGGTCCGGGTACACCGTGCATGTACAGTGTA  
ACGCCTCCAAATTCACCAGGGGGCACTAGGGGTATTTCGCCGTACCAGAGATGTGTCTGGCCGGGGAT  
AGCAACACCACTACCATGCACACCAGCTATCAAAATGCCAATCCTGGCGAGAAAGGAGGCACCTTCAC  
GGGTACGTTCACTCCTGACAACAACCAGACATCACCTGCCCGCAGGTTCTGCCCGGTGGATTACCTCC  
TTGGAAATGGCACGTTGTTGGGGAATGCCTTTGTGTTCCCGCACCAAGATAATAAACCTACGGACCAAC  
AACTGTGCTACACTGGTACTCCCTTACGTGAACCTCCCTCTCGATAGATAGTATGGTAAAGCACAATAA  
TTGGGGAATTGCAATATTACCATTGGCCCCATTAATTTTTGCTAGTGAGTCTCCCCAGAGATTCCAA  
TCACCTTGACCATAGCCCCTATGTGCTGTGAGTTCAATGGATTAAGAAACATCACCCCTGCCACGCTTA  
CAGGGCCTGCCGGTCATGAACACCCCTGGTAGCAATCAATATCTTACTGCAGACAACCTCCAGTCACC  
GTGTGCGCTGCCTGAATTTGATGTGACCCACCTATTGACATACCCGGTGAAGTAAAGAACATGATGG  
AATTGGCAGAAATCGACACCATGATTCCCTTTGACTTAAGTGCCACAAAAAAGAACACCATGGAAATG  
TATAGGGTTCGGTTAAGTGACAAACCACATACAGACGATCCCATACTCTGCCTGTCACTCTCTCCAGC  
TTCAGATCCTAGGTTGTACATACTATGCTTGGAGAAATCCTAAATTACTACACACACTGGGCAGGAT  
CCCTGAAGTTCACGTTTATGTTCTGTGGATCCATGATGGCAACTGGCAAACTGTTGGTGTACATACGG  
CCTCCTGGAGCCGACCCACCAAAGAAGCGTAAGGAGGCGATGTTGGGAACACATGTGATCTGGGACAT  
AGGACTGCAGTCCCTCATGTACTATGGTAGTGCCATGGATTAGCAACACCACGTATCGGCTAACCATAG  
ATGATAGTTTTACCGAAGGCGGATACATCAGCGTCTTCTACCAAAGTAGAATAGTCGTCCCTCTTTTCG  
ACACCCAGAGAGATGGACATCCTTGGTTTTGTGTGACGCTGTAATGACTTCAGCGTGCCTTGTTCGG  
AGATACCACACATATAGAGCAAAAAGCGCTAGCACAGGGGTTAGGTGAGATGCTTGAAAGCATGATTG  
ACAACACAGTCCGTGAAACGGTGGGGGCGCAACATCTAGAGACGCTCTCCCAAACACTGAAGCCAGT  
GGACCAACACACTCCAAGGAAATTCGGCACTCACCGCAGTGGAAACTGGGGCCACAAATCCACTAGT  
CCCTTCTGATACAGTGCAAACCAGACATGTTGTACAACATAGGTCAAGGTCAGAGTCTAGCATAGAGT  
CTTTCTTCGCGCGGGGTGCATGCGTGACCATTATGACCGTGGATAAACCAGCTTCCACCACGAATAAG  
GATAAGCTATTTGCAGTGTGGAAGATCACTTATAAAGATACTGTCCAGTTACGGAGGAAATTTGGAGTT  
CTTACCTATTCTAGATTTGATATGGAACCTACCTTTGTGGTTACTGCAAATTTCACTGAGACTAACA  
ATGGGCATGCCTTAAATCAAGTGTACCAAATATGTACGTACCACCAGGCGCTCCAGTGGCCGAGAAA  
TGGGACGACTACACATGGCAAACCTCATCAAATCCATCAATCTTTTACACCTACGGAACAGCTCCAGC  
CCGGATCTCGGTACCGTATGTTGGTATTTTGAACGCCTATTCACACTTTTACGACGGTTTTTCCAAAG  
TACCACTGAAGGACCAGTCGGCAGCACTAGGTGACTCCCTTTATGGTGCAGCATCTCTAAATGACTTC  
GGTATTTTGGCTGTTAGAGTAGTCAATGATCCCAACCCGACCAAGGTCACCTCCAAAATCAGAGTGTA  
TCTAAAACCCAAAACACATCAGAGTCTGGTGGCCGCTCCACCGAGGGCAGTGGCGTACTACGGCCCTG  
GAGTGGATTACAAGGATGGTACGTTACACCCCTCTCCACCAAGGATCTGACCACATATCATCACCAT  
CACCATCACTAG

## PV1 3CD *Pichia*-optimised Sequence

ATGGGGCCTGGGTTTACTATGCAGTAGCCATGGCCAAGAGAAACATTGTTACAGCAACTACATCCAA  
AGGTGAGTTCACAATGTTGGGTGTTTCATGATAATGTTGCAATTTTACCAACTCACGCTTCACCAGGCG  
AATCAATTGTCATTGATGGGAAGGAGGTGGAGATACTAGACGCTAAAGCTTTAGAGGATCAGGCCGGC  
ACCAACTTAGAAATCACCATTATCACATTA AAAAGAAAACGAAAAATTCCGAGACATCAGACCACACAT  
TCCTACTCAGATTACTGAGACAAAACGATGGGGTCTTGATTGTCAATACGTCTAAGTATCCCAATATGT  
ATGTTCCAGTTGGAGCTGTAACAGAGCAAGGGTACTTAAACTTGGGTGGTAGACAGACTGCCAGAACT  
CTTATGTACAACCTTTCCTACAAGAGCTGGTCAGTGCAGTGGAGTGATTACCTGCACAGGAAAGGTCAT  
TGGTATGCACGTTGGTGGTAATGGTTCCCACGGTTTCGCTGCCGCTTTGAAGCGTTCCTATTTTACTC  
AATCCTCCCAAGGAGAGATCCAGTGGATGAGACCCTCTAAAGAGGTTGGCTATCCCATAATTAACGCC  
CCTTCTAAGACTAACTTGAGCCATCTGCCTTTCATTATGTCCTTGAAGGCGTCAAAGAACCCGCAGT  
GTTGACTAAGAATGACCCTAGATTGAAAACGGATTTTGAGGAGGCCATATTTTCTAAATATGTCGGTA  
ACAAGATTACCGAAGTTGATGAATACATGAAGGAAGCCGTTGACCATTATGCTGGACAGTTGATGTCT  
TTGGACATTAACACTGAGCAGATGTGCCTTGAAGATGCTATGTACGGTACTGATGGTCTGGAAGCTTT  
AGATCTGAGTACCTCTGCTGGTTATCCATATGTCGCTATGGGTAAGAAGAAAAGAGATATTTCTGAATA  
AACAACTAGAGATACTAAGGAAATGCAAAAGCTGTTGGACACATACGGGATCAATCTTCCTTTGGTG  
ACCTATGTAAAAGATGAGCTAAGGTCTAAGACAAAGGTTGAACAGGGTAAGTCTCGATTAATTGAAGC  
ATCTTCACTTAATGATTCTGTAGCAATGAGGATGGCCTTTGGTAACCTTTATGCTGCCTTCCATAAAA  
ACCCAGGCGTGATCACGGGATCTGCTGTGCGTTGCGATCCCGATTTGTTTTGGTCCAAAATCCCTGTG  
CTAATGGAGGAGAAGTTATTTGCCTTTGACTACACTGGCTATGACGCATCATTATCTCCAGCATGGTT  
CGAAGCCTTGAAAATGGTCCTTGAGAAGATAGGCTTTGGAGATAGAGTAGATTACATTGATTATTTGA  
ATCACTCTCATCATTTATATAAGAATAAGACTTACTGTGTTAAGGGTGGAATGCCTTCTGGTTGTTCC  
GGGACATCCATTTTCAATAGTATGATCAACAACCTTGATCATAAGAACATTGCTGCTTAAAACGTACAA  
GGGTATTGATCTAGATCACTTGAAAATGATCGCTTACGGTGACGATGTCATCGCTTCCATCCTCACG  
AAGTCGACGCATCTCTTCTTGCCAGAGTGGAAAAGATTACGGACTAACCATGACTCCAGCAGACAAG  
AGTGCTACTTTTGAACCGTGACATGGGAAAACGTGACTTCTTGAAGAGGTTTTTTTAGAGCCGACGA  
AAAAATACCCATTTCTAATACACCCCGTCATGCCTATGAAGGAAATTCACGAGTCTATCCGTTGGACGA  
AAGACCCACGTAACACTCAGGATCATGTGAGGTCTCTATGTCCTATTAGCTTGGCACAATGGTGAAGAG  
GAGTACAATAAATTCCTTGCAAAGATCAGAAGTGTTCCTATAGGACGTCATTGTTGTTGCCAGAATA  
TTCCACCCTGTACCGTAGATGGCTAGACTCTTTTTAG

### **PV1 SC6b VP0**

ATGGGAGCTCAGGTTTCATCACAGAAAGTGGGCGCACATGAAAAC TCAAATGGAGCGTATGGTGGTTC  
TACCATTAATTACACCACCATTAATTATTATAGAGATTCAGCTAGTAACGCGGCTTCGAAACAGGACT  
TCTCTCAAGACCC TTC AAGTTCACCGAGCCCATCAAGGATGTCCTGATAAAAACAGCCCCAATGCTA  
AACTCGCCAAACATAGAGGCTTGC GGGTATAGCGATAGAGTACTGCAATTAACACTGGGAAACTCCAC  
TATAACCGCACAGGAGGCGGCTAATTCAGTAGTCGCTTATGGGCGTTGGCCTGAATATCTGAGGGACA  
GCGAAGCCAATCCAGTGGACCAGCCGACAGAACCAGAAGTCGCTGCATGCAGTTTTTATACGCTAGAC  
ACCGTGTCTTGGACGAAAGAGTCGCGAGGGTGGTGGTGGAAAGTTGCCTGATGC ACTGAGGGACATGGG  
ACTCTTTGGGCAAAATATGTACTACCACTACCTAGGTAGGTCCGGGTACACCGTGCATGTACAGTGTA  
ACGCCTCCAAATTCACCAGGGGGCACTAGGGGTATTCCCGGTACCAGAGATGTGTCTGGCCGGGGAT  
AGCAACACCACTACCATGCACACCAGCTATCAAATGCCAATCCTGGCGAGAAAGGAGGCAC TTTTCAC  
GGGTACGTTCACTCCTGACAACAACCAGACATCACCTGCCCGCAGGTTCTGCCCGGTGGATTACCTCC  
TTGGAAATGGCACGTTGTTGGGGAATGCCTTTGTGTTCCCGCACCAGATAATAAACCTACGGACCAAC  
AACTGTGCTACACTGGTACTCCCTTACGTGAACCTCCTCTCGATAGATAGTATGGTAAAGCACAATAA  
TTGGGGAATTGCAATATTACCATTGGCCCCATTAATTTTGCTAGTGAGTCTCCCCAGAGATTCCAA  
TCACCTTGACCATAGCCCCTATGTGCTGTGAGTTC AATGGATTAAGAAACATCACCTGCCACGCTTA  
CAG

### **PV1 SC6b VP3**

GGCCTGCCGGT CATGAACACCCCTGGTAGCAATCAATATCTTACTGCAGACAACTTCCAGTCACCGTG  
TGCGCTGCCTGAA TTTGATGTGACCCACCTATTGACATACCCGGTGAAGTAAAGAACATGATGGAAT  
TGGCAGAAATCGACACCATGATTCCTTTGACTTAAGTGCCACAAAAAGAACACCATGGAAATGTAT  
AGGGTTCGGTTAAGTGACAAACCACATACAGACGATCCCATACTCTGCCTGTCACTCTCTCCAGCTTC  
AGATCCTAGGTTGTCACATACTATGCTTGGAGAAATCCTAAATTA CTACACACACTGGGCAGGATCCC  
TGAAGTTCACGTTTATGTTCTGTGGATCCATGATGGCAACTGGCAA ACTGTTGGTGT CATACGCGCCT  
CCTGGAGCCGACCCACCAAGAAGCGTAAGGAGGCGATGTTGGGAACACATGTGATCTGGGACATAGG  
ACTGCAGTCCCTCATGTACTATGGTAGTGCCATGGATTAGCAACACCACGTATCGGCTAACCATAGATG  
ATAGTTTCACCGAAGGCGGATACATCAGCGTCTTCTACCAA ACTAGAATAGTCGTCCCTCTTTTCGACA  
CCCAGAGAGATGGACATCCTTGGTTTTGTGTCAGCGTGTAATGACTTCAGCGTGCCTTGTTCGAGA  
TACCACACATATAGAGCAAAAAGCGCTAGCACAG

### **PV1 SC6b VP1**

GGGTTAGGTCAGATGCTTGAAAGCATGATTGACAACACAGTCCGTGAAACGGTGGGGGCGGCAACATC  
TAGAGACGCTCTCCCAAACACTGAAGCCAGTGGACCAACACACTCCAAGGAAATTCGGCACTCACCG  
CAGTGGAAACTGGGGCCACAAA TCCACTAGTCCCTTCTGATACAGTGCAAACCAGACATGTTGTACAA  
CATAGGTCAAGGTCAGAGTCTAGCATAGAGTCTTTCTTCGCGCGGGGTGCATGCGTGACCATTATGAC  
CGTGGATAACCCAGCTTCCACCACGAATAAGGATAAGCTATTTGCAGTGTGGAAGATCACTTATAAAG  
ATACTGTCCAGTTACGGAGGAAATTTGGAGTTCCTTACCTATTCTAGATTTGATATGGAAC TTAACCTTT  
GTGGTTACTGCAAATTTCACTGAGACTAACAATGGGCATGCCTTAAATCAAGTGTACCAAATTTATGTA  
CGTACCACCAGGCGCTCCAGTGCCCGAGAAATGGGACGACTACACATGGCAAACCTCATCAAATCCAT  
CAATCTTTTACACCTACGGAACAGCTCCAGCCCGGATCTCGGTACCGTATGTTGGTATTTTCGAACGCC  
TATTCACACTTTTACGACGGTTTTTCCAAAGTACCACTGAAGGACCAGTCGGCAGCACTAGGTGACTC  
CCTTTATGGTGCAGCATCTCTAAATGACTTCGGTATTTTGGCTGTTAGAGTAGTCAATGATCCCAACC  
CGACCAAGGTACCTCCAAAATCAGAGTGTATCTAAAACCCAAACACATCAGAGTCTGGTGGCCGCGT  
CCACCGAGGGCAGTGGCGTACTACGGCCCTGGAGTGGATTACAAGGATGGTACGCTTACACCCCTCTC  
CACCAAGGATCTGACCACATAT

### **GSG-Porcine Teschovirus 2A**

GGAAGCGGAGCTACTAACTTCAGCCTGCTGAAGCAGGCTGGAGACGTGGAGGAGAACCCTGGACCT
